# Supplementary material
Source: PubMed Central journal article supplement (PMC9245682)
Supplement: NIHMS1818420-supplement-Supplementary_Figure.pdf [file NIHMS1818420-supplement-Supplementary_Figure.pdf]

## Supplement

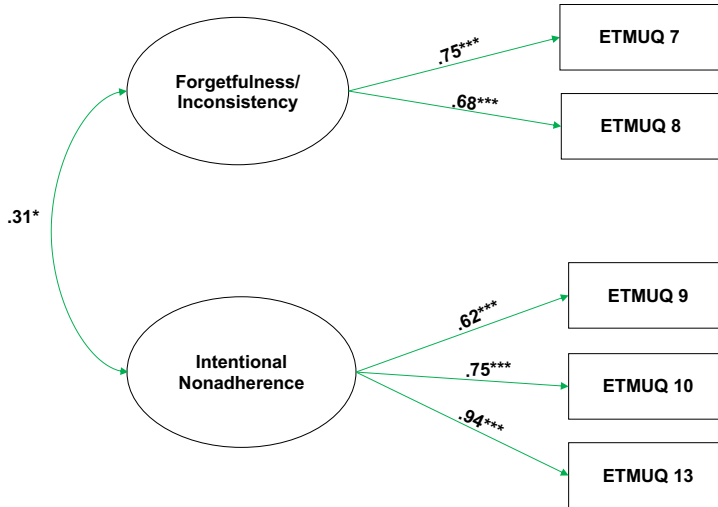

**Supplementary Figure 1.** Bayesian confirmatory factor analysis of the ETMUQ. Standardized coefficients are reported for each path and factor loading. \* $p < .05$ , \*\* $p < .01$ , \*\*\* $p < .001$
